# Supplementary figures and images for: Genomic and Metabolic Studies of the Impact of Probiotics on a Model Gut Symbiont and Host
Source: PLOS journal article supplement (doi:10.1371/journal.pbio.0040413), 2006-11-22

A.

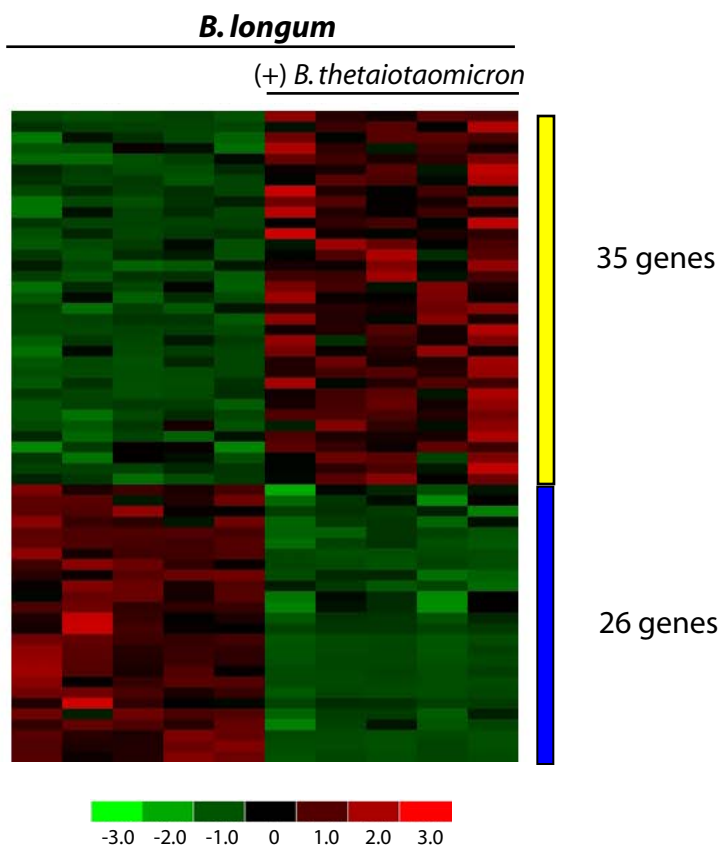

B.

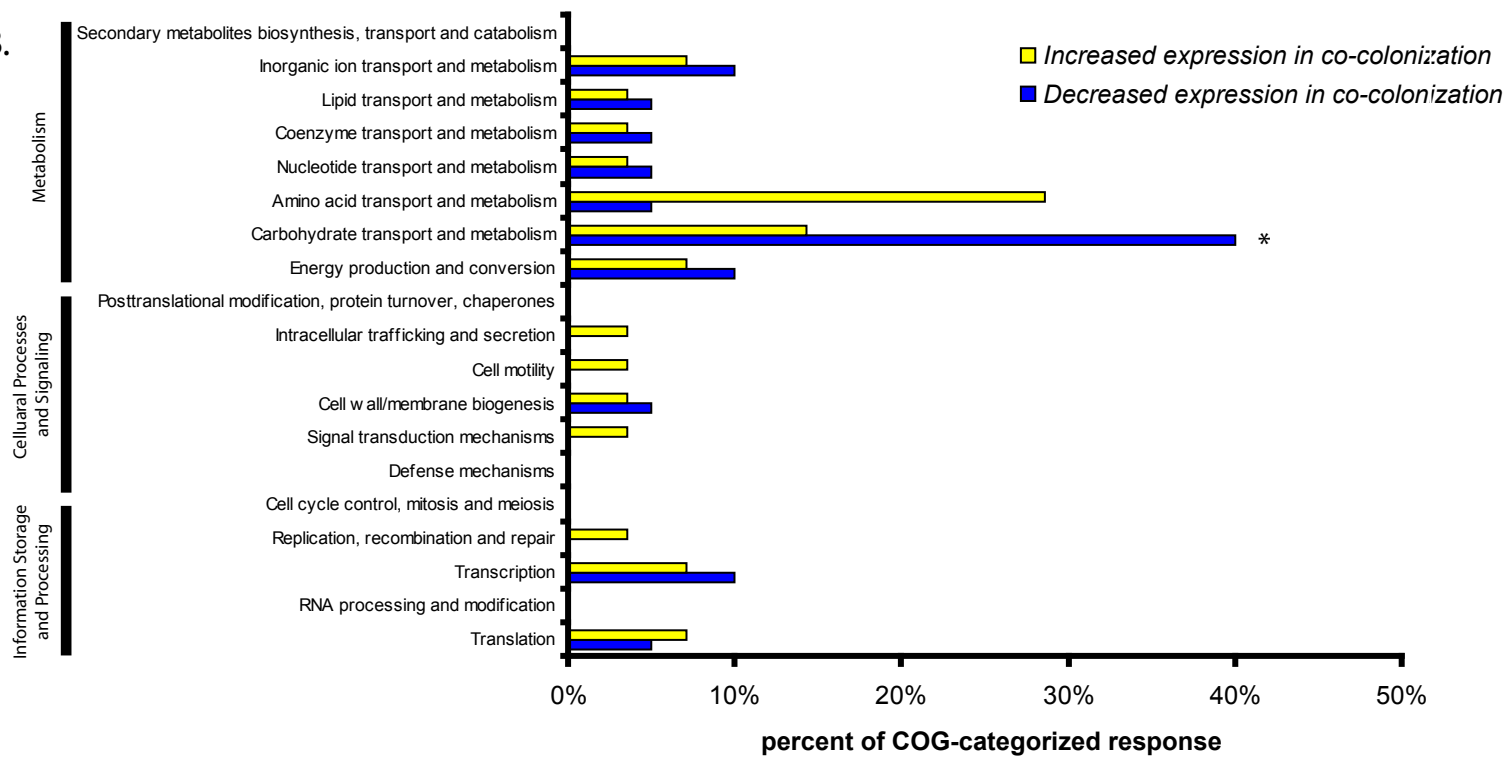

Supplement: S3 (10.1371/journal.pbio.0040413.s003) [file journal.pbio.0040413.s003]

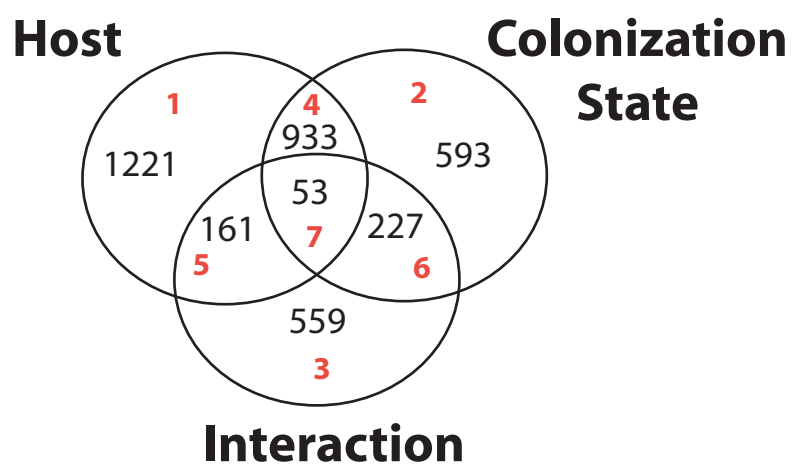

Supplement: S4 (10.1371/journal.pbio.0040413.s004) [file journal.pbio.0040413.s004]

A.

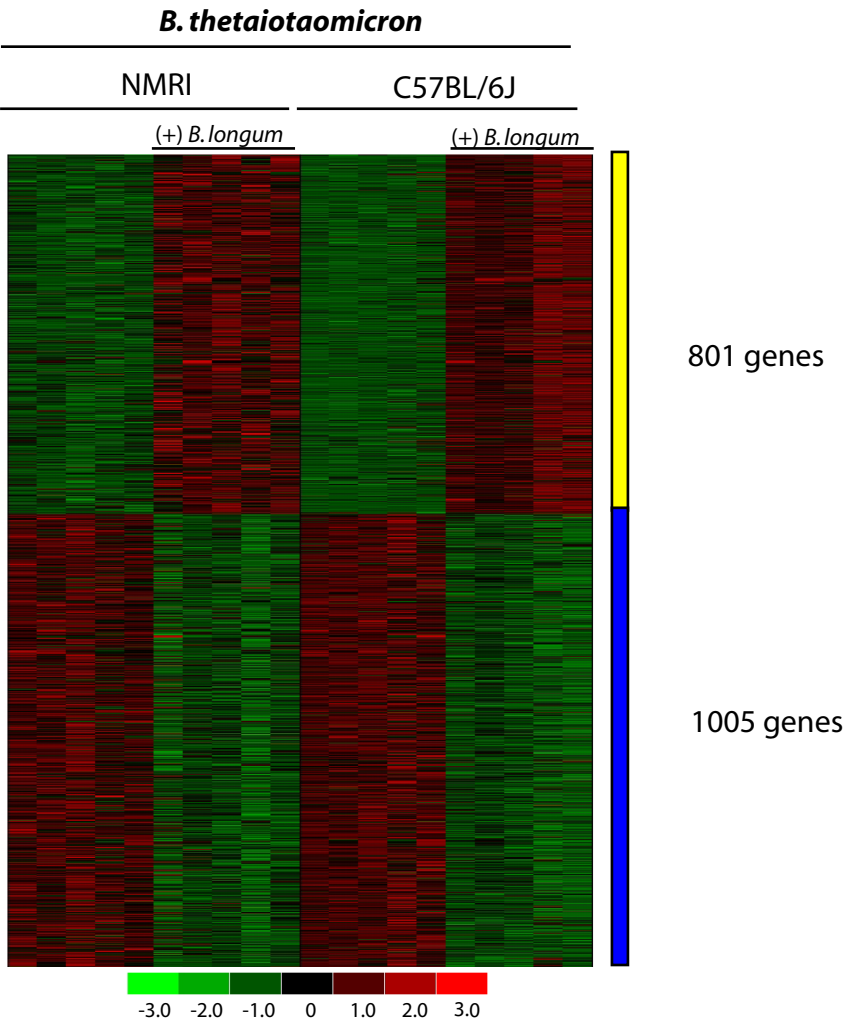

B.

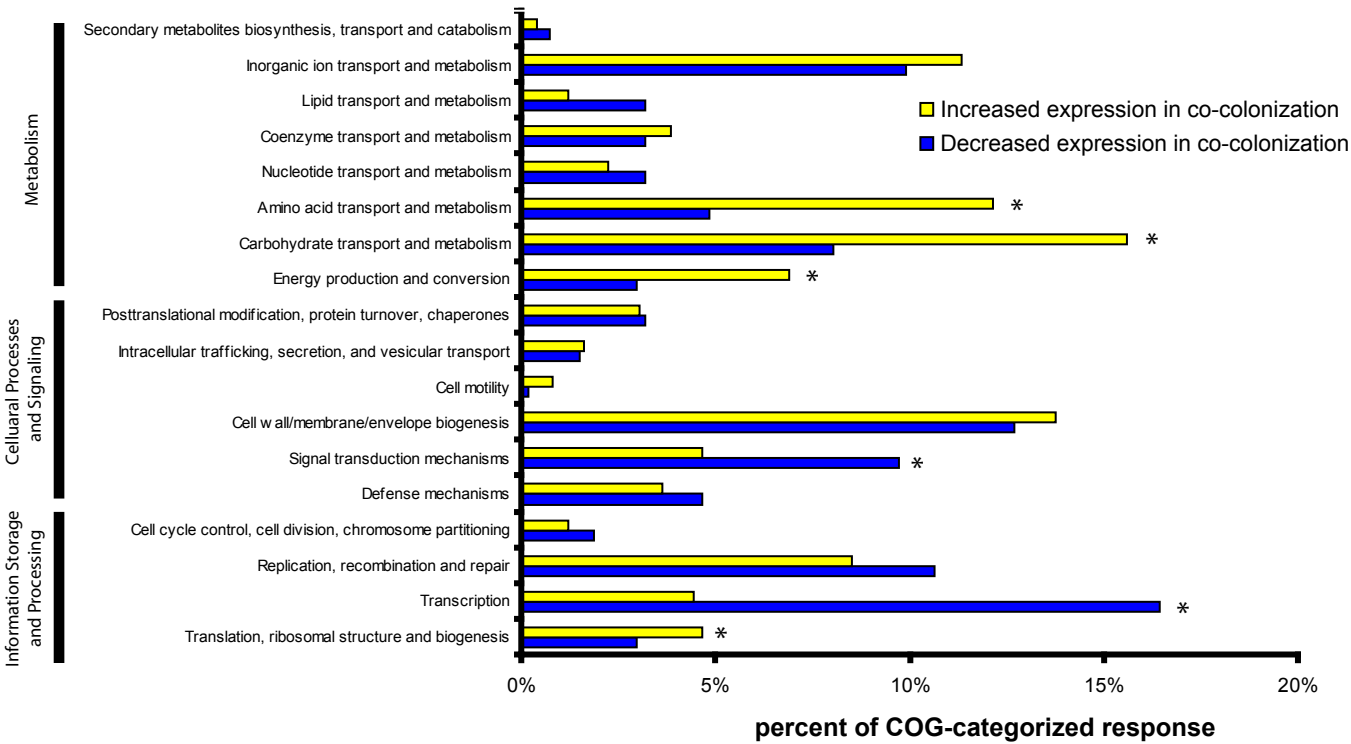

Supplement: S6 (10.1371/journal.pbio.0040413.s006) [file journal.pbio.0040413.s006]

Sonnenburg et al.  
Figure S9

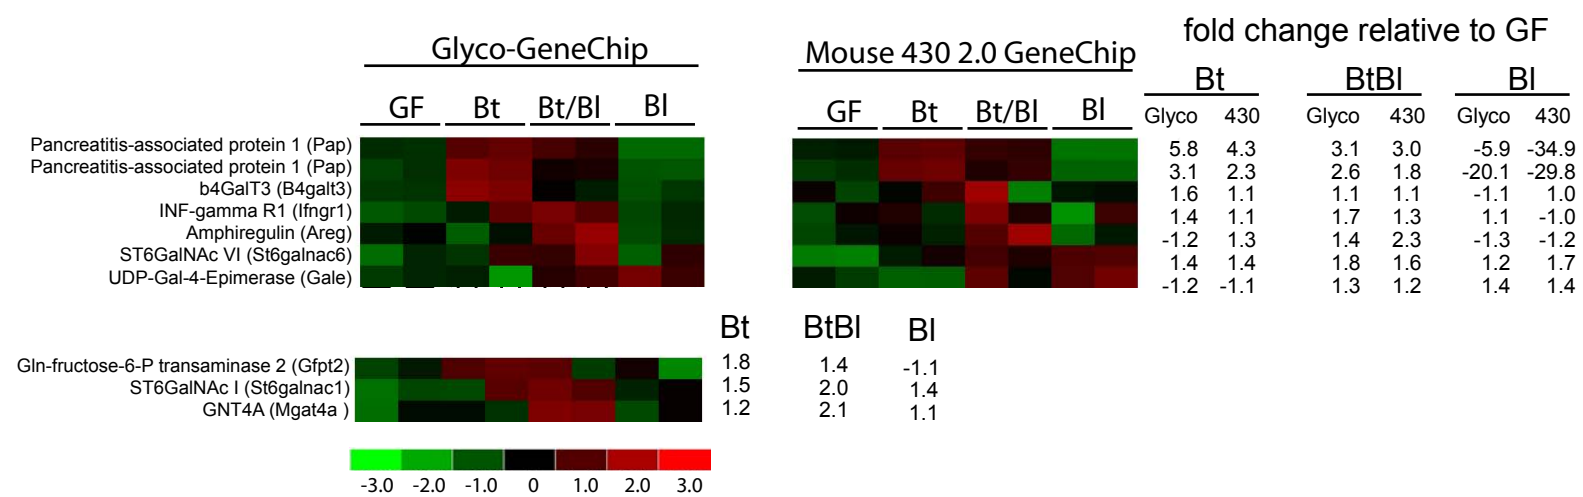

Supplement: S9 (10.1371/journal.pbio.0040413.s009) [file journal.pbio.0040413.s009]
